# Supplementary material
Source: MDPI journal article supplement (https://www.mdpi.com/1424-8247/15/12/1450)
Supplement: s1 [file s1]

**Table S1.** Donor CBCs. Complete blood counts (CBCs) expressed as mean (standard deviation (SD)) for all donors at their first and second donations.

| <b>Parameter</b>                                 | <b>Donation 1 (mean (SD))</b> | <b>Donation 2 (mean (SD))</b> |
|--------------------------------------------------|-------------------------------|-------------------------------|
| Platelet Count (*10 <sup>3</sup> cells/ $\mu$ L) | 174 (32)                      | 189 (26)                      |
| Mean Platelet Volume (fL)                        | 10.7 (0.6)                    | 11.6 (0.3)                    |
| Hematocrit (%)                                   | 37.3 (1.7)                    | 38.9 (1.2)                    |
| Hemoglobin (g/dL)                                | 12.9 (0.7)                    | 12.9 (0.5)                    |
